# Supplementary material
Source: Springer Nature journal article supplement (https://www.springermedizin.de/resource/supplementary/12943_2014_1342_MOESM2_ESM.pdf/9552780)

9

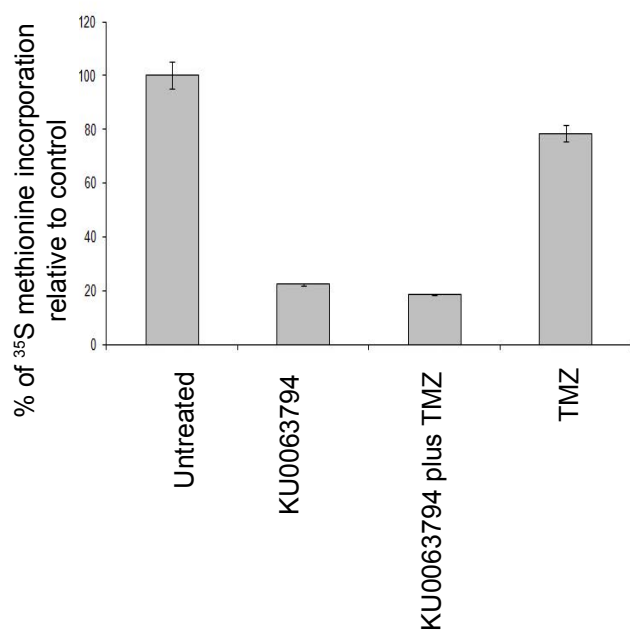

10

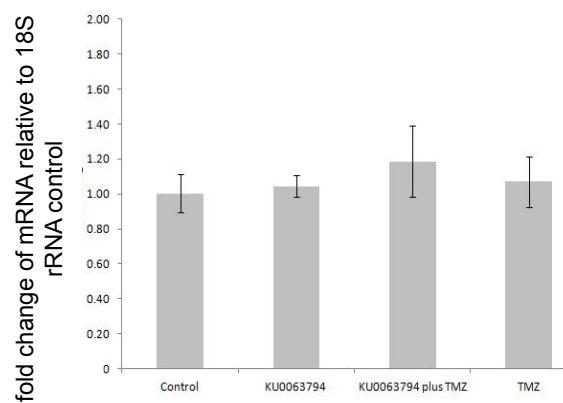

Supplement: MOESM2 [file 9552780]
